# Supplementary material
Source: Springer Nature journal article supplement (https://www.springermedizin.de/resource/supplementary/13058_2014_3424_MOESM9_ESM.pdf/9704150)

## Integrin $\alpha 2$ knockdown validation

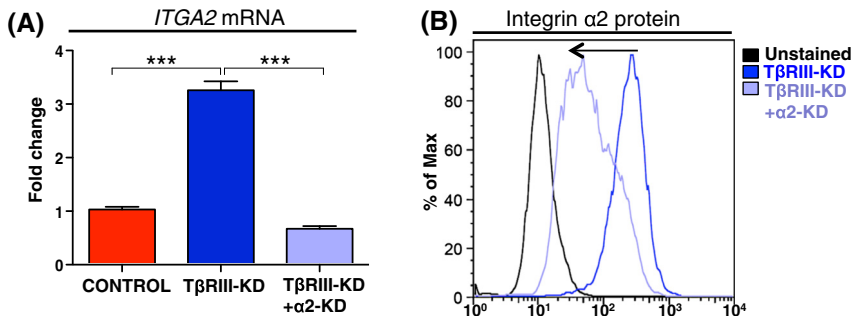

## Migration Assay

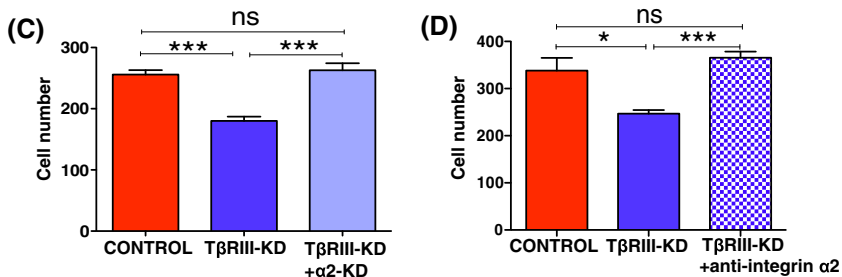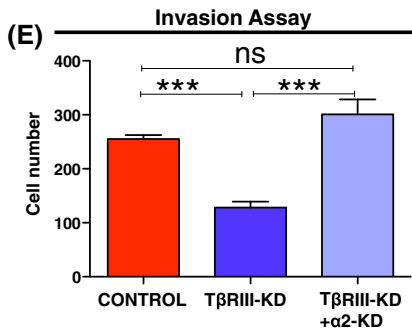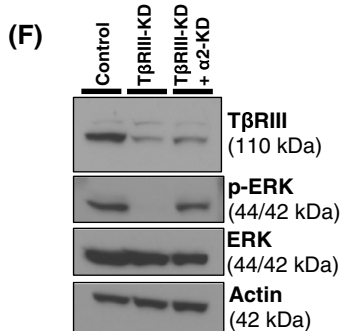

Supplement: MOESM9 [file 9704150]
